# Supplementary material
Source: PubMed Central journal article supplement (PMC3308801)
Supplement: supp_M111.330100_jbc.M111.330100-1.pdf [file supp_M111.330100_jbc.M111.330100-1.pdf]

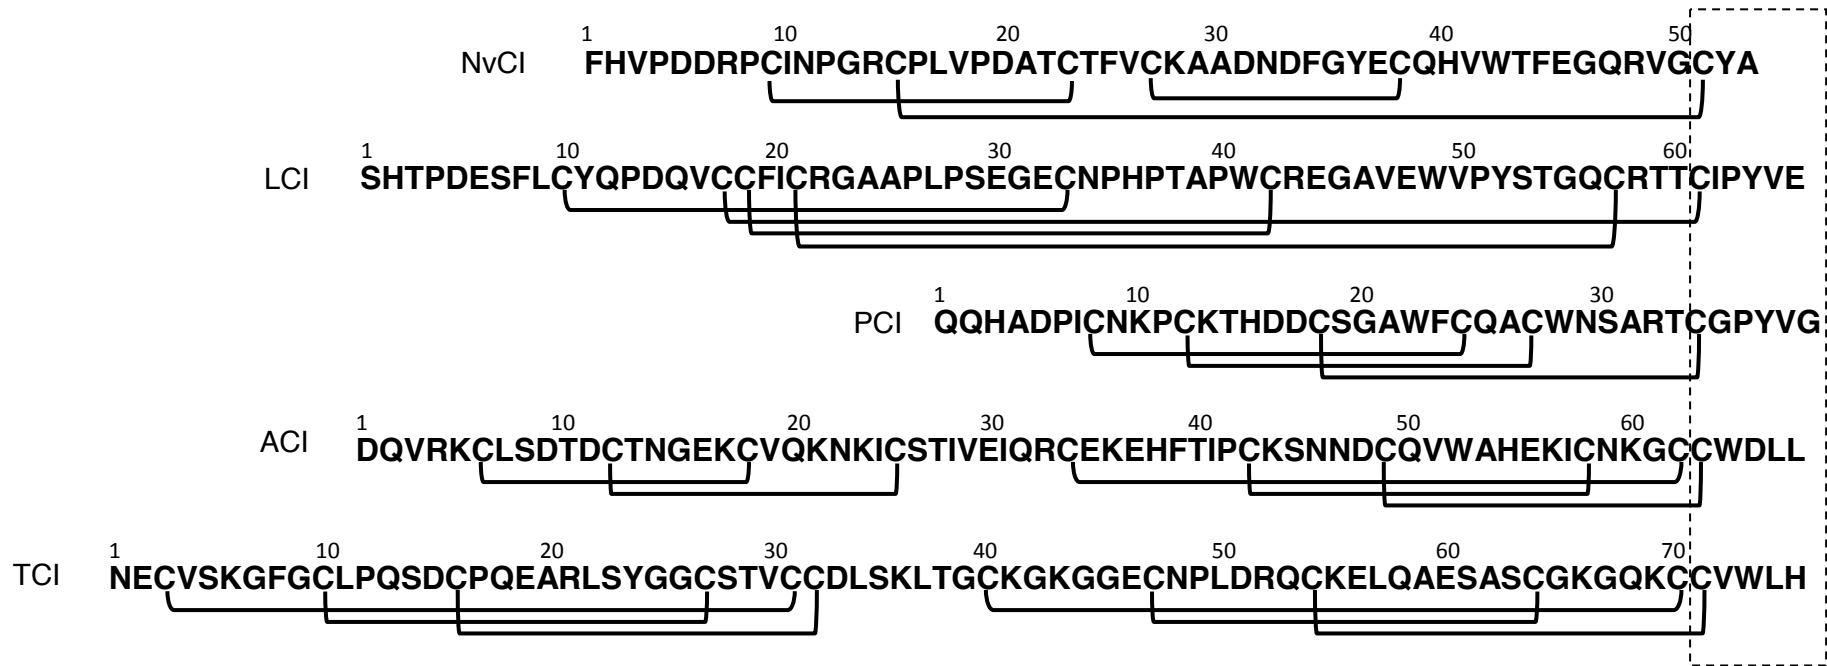

**Fig S1. Comparison of the amino acid sequence of NvCI and other MCPs inhibitors.**

NvCI (Uniprot ID: P86912), LCI (P81511), PCI (P01075), ACI (C0SNP0), TCI (Q5EPH2).

Cysteine residues involved in disulfide bridges have been connected by a straight line.

The C-terminal tails of several MCPs inhibitors have been aligned and included in a dashed box.
